# Supplementary material for: Physiologically Based Pharmacokinetic Model Development and Verification for Bioequivalence Testing of Bempedoic Acid Oral Suspension and Reference Tablet Formulation
Source: MDPI journal article supplement (doi:10.3390/pharmaceutics15051476), 2023-05-12
Supplement: s1 [file s1]

# Supplementary Materials: Physiologically Based Pharmacokinetic Model Development and Verification for Bioequivalence Testing of Bempedoic Acid Oral Suspension and Reference Tablet Formulation

**Figure S1.** Bempedoic acid physiologically based pharmacokinetic (PBPK) model schematic.

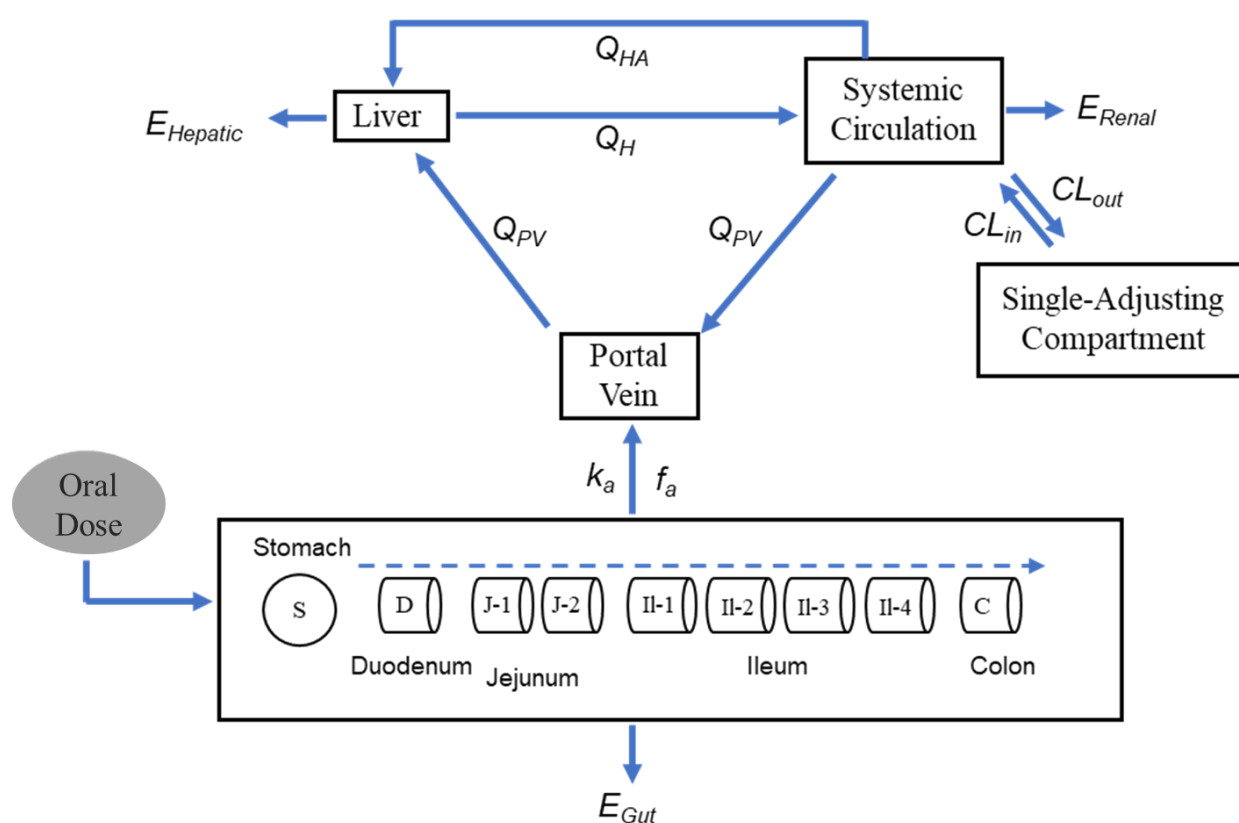

$CL_{in}$ ,  $CL_{out}$ , intercompartmental clearance; C, colon; D, duodenum;  $E_{Gut}$ ,  $E_{Hepatic}$ ,  $E_{Renal}$ , extraction by the gut, liver and kidney, respectively;  $f_a$ , fraction of dose absorbed; Il, ileum; J, jejunum;  $k_a$ , absorption rate constant;  $Q_H$ ,  $Q_{HA}$ ,  $Q_{PV}$ , blood flow in liver, hepatic artery and portal vein, respectively; S, stomach.

**Table S1.** Summary of bempedoic acid pharmacokinetic parameters after single 180 mg bempedoic acid administration and statistical analysis for the comparison of formulation 2 to formulation 1 (Study 004).

| PK Parameter                  | Geometric LS Mean       |                         | Ratio of Geometric LS Means<br>(90% CI) |
|-------------------------------|-------------------------|-------------------------|-----------------------------------------|
|                               | Formulation 2<br>(n=59) | Formulation 1<br>(n=58) | Formulation 2 to Formulation 1          |
| C <sub>max</sub> , µg/mL      | 18.4                    | 18.7                    | 0.983 (0.9421–1.0263)                   |
| AUC <sub>inf</sub> , µg·h/mL  | 269                     | 265                     | 1.016 (0.9876–1.0454)                   |
| AUC <sub>last</sub> , µg·h/mL | 263                     | 260                     | 1.012 (0.9855–1.0398)                   |

AUC<sub>inf</sub>, area under the concentration-time curve from time zero to infinity; AUC<sub>last</sub>, area under concentration-time curve from time zero to last timepoint; CI, confidence interval; C<sub>max</sub>, maximum concentration; LS, least square; PK, pharmacokinetics. C<sub>max</sub>, AUC<sub>last</sub>, AUC<sub>inf</sub> estimates are rounded to 3 significant figures.

The log-transformed PK parameters (AUC<sub>last</sub>, AUC<sub>inf</sub> and C<sub>max</sub>) were analyzed using a linear mixed model, with fixed effects for treatment, period and sequence, subject within sequence as random effect.

Formulation 1, immediate release tablet used during clinical development; Formulation 2, commercial immediate release tablet.

**Table S2.** Dissolution of bempedoic acid 180 mg immediate release tablets.

| Buffer                    | Average % Dissolved (Released), n=12 |        |        |        |        |        |        |        |
|---------------------------|--------------------------------------|--------|--------|--------|--------|--------|--------|--------|
|                           | 5 min                                | 10 min | 15 min | 20 min | 30 min | 45 min | 60 min | 75 min |
| 0.1N HCl<br>pH 1.2        | 0                                    | 1      | 1      | 2      | 2      | 2      | 3      | 3      |
| 50 mM Acetate<br>pH 4.5   | 0                                    | 3      | 3      | 4      | 5      | 5      | 5      | 5      |
| 50 mM Phosphate<br>pH 6.6 | 26                                   | 69     | 93     | 99     | 101    | 101    | 101    | 101    |
| 50 mM Phosphate<br>pH 6.8 | 33                                   | 82     | 101    | 103    | 104    | 104    | 104    | 104    |

Dissolution of bempedoic acid tablet (Lot 99743-07D) was determined using USP apparatus II operated at 50 rpm in 900 mL media volume.

**Table S3.** Dissolution of bempedoic acid 180 mg oral suspension (20 mg/mL).

| Buffer                    | Average % Dissolved (Released), n=12 |        |        |        |        |        |        |        |
|---------------------------|--------------------------------------|--------|--------|--------|--------|--------|--------|--------|
|                           | 5 min                                | 10 min | 15 min | 20 min | 30 min | 45 min | 60 min | 75 min |
| 0.1N HCl<br>pH 1.2        | 2                                    | 2      | 2      | 2      | 3      | 3      | 3      | 3      |
| 50 mM Acetate<br>pH 4.5   | 2                                    | 3      | 4      | 4      | 4      | 4      | 4      | 4      |
| 50 mM Phosphate<br>pH 6.6 | 75                                   | 87     | 90     | 91     | 92     | 93     | 93     | 96     |
| 50 mM Phosphate<br>pH 6.8 | 88                                   | 91     | 92     | 92     | 93     | 93     | 94     | 95     |

Dissolution of bempedoic acid suspension formulation (Lot 0000091928) was determined using USP apparatus II operated at 50 rpm in 900 mL media volume.
